# Supplementary material for: Highly ordered ZnMnO3 nanotube arrays from a “self-sacrificial” ZnO template as high-performance electrodes for lithium ion batteries
Source: Royal Society of Chemistry journal article supplement (doi:10.1039/c6ta06748d), 2016-01-01
Supplement: c6ta06748d1.pdf [file c6ta06748d1.pdf]

## Supporting Information

Highly ordered ZnMnO<sub>3</sub> nanotube arrays from “self-sacrificial” ZnO  
template as high-performance electrodes for lithium ion batteries

Hongbin Chen, Liang-Xin Ding,\* Kang Xiao, Sheng Dai,

Suqing Wang and Haihui Wang\*

*School of Chemistry & Chemical Engineering, South China University of Technology, Guangzhou  
510640, China.*

*School of Chemical Engineering, The University of Adelaide, SA 5006, Adelaide, Australia.*

## ***1. Experimental section***

### *1.1 Preparations of ZnMnO<sub>3</sub> NTAs on nickel foam*

All chemical reagents were analytical (AR) grade and purchased without any further purification. Electrochemical deposition proceeds in a two-electrode electrolyzer via galvanostatic electro-deposition, and the graphite electrode was used as a counter electrode. Nickel foam as a working electrode. ZnO nanorods arrays (ZnO NRAs) template was electrodeposited in solution of 0.01 M Zn(NO<sub>3</sub>)<sub>2</sub> and 0.05 M NH<sub>4</sub>NO<sub>3</sub> at a current density of 1.5 mA·cm<sup>-2</sup> at 70 °C for 90 min. Then, the ZnO@ZnMnO<sub>3</sub>-precursors core-shell NTAs were obtained by electro-deposition of nanoparticles on the surfaces of ZnO nanorods in solution of 0.01 M Mn(CH<sub>3</sub>COO)<sub>2</sub>·4H<sub>2</sub>O and 0.02 M CH<sub>3</sub>COONH<sub>4</sub> with current density of -0.25 mA·cm<sup>-2</sup> at 70 °C for 20 min. Then the as-prepared sample was placed into a tube furnace under argon air at the temperature 300 °C for 300 min. The ZnO@ZnMnO<sub>3</sub>-precursors core-shell NTAs were fabricated.

The prepared ZnO@ZnMnO<sub>3</sub>-precursors core-shell NTAs were immersed in ammonia solution for 12 h to completely dissolved the residual ZnO NRAs template, and eventually the ZnMnO<sub>3</sub> NTAs were obtained.

### *1.2 Material characterization*

The microstructure of ZnMnO<sub>3</sub> NTAs was characterized by scanning electron microscopy (SEM) (Quanta 200F) and transmission electron microscopy (TEM) (FEI, Tecnai G2 F30 S-Twin). The elements and chemical formula were tested by X-ray diffraction (XRD) (Bruker D8 Advance). The elemental component was tested by energy dispersive X-ray analyzer (EDX) (X-MaxN20). The elements and valence state of the surface of samples was investigated by X-ray photoelectron spectroscopy (XPS) (ESCALAB250).

### *1.3 Electrochemical measurements*

The electrochemical properties were investigated based on coin cells (CR2025). The celgard (2325) membrane was used as the separator between cathode and anode. The electrolyte solution consisted of  $\text{LiPF}_6$ , ethylenecarbonate and diethylcarbonate. 1 M  $\text{LiPF}_6$  dissolved in blend of 500 mL ethylenecarbonate and 500 mL diethylcarbonate. Analytical grade lithium plate was assembled as the cathode and  $\text{ZnMnO}_3$  NTAs were the anode. The coin cells were assembled and installed in an inert atmosphere (Ar) in glove-box (Mikrouna, super 1220) where a constant amount of oxygen and moisture less than 1 ppm. The galvanostatic charge and discharge of the coin cells were processed on a multi-channel battery testing device (Neware Electronic Co., China) in the voltage range from 0.01-3.0 V at constant temperature of 25 °C. Cycle voltammetry (CV) and electrochemical impedance spectra (EIS) of the coin cells were processed by electrochemical workstation (Zahner IM6ex) at a scanning rate of 0.2 mV s<sup>-1</sup>.

2. Supplementary figures and tables

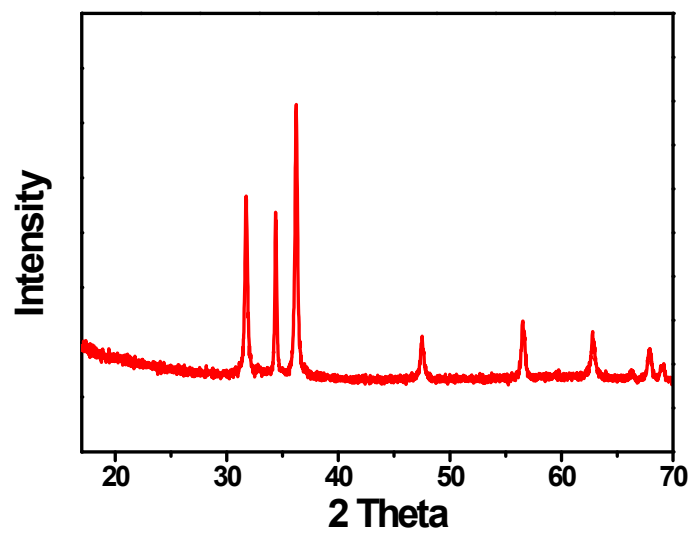

Fig. S1 XRD pattern of ZnO template.

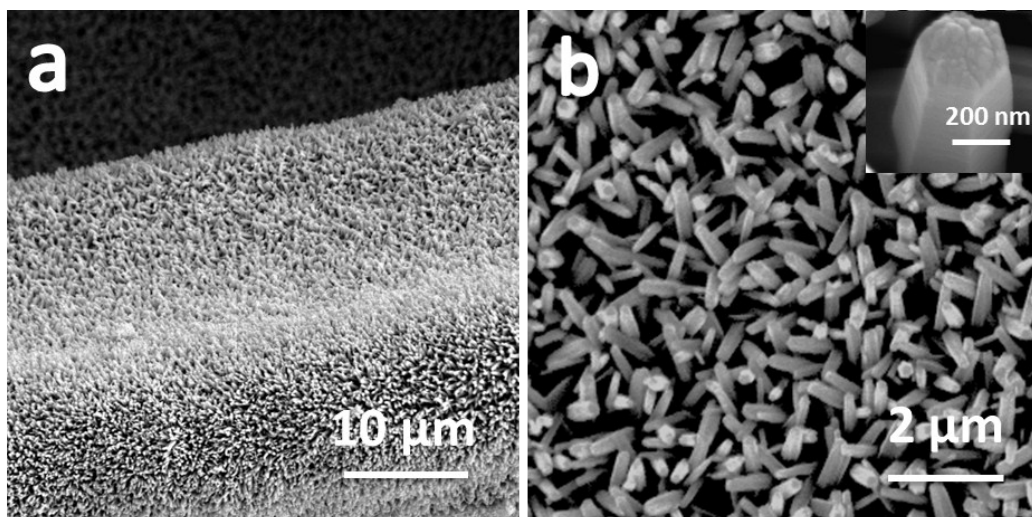

Fig. S2 (a-b) SEM images of ZnO nanorods on nickel foam substrate.

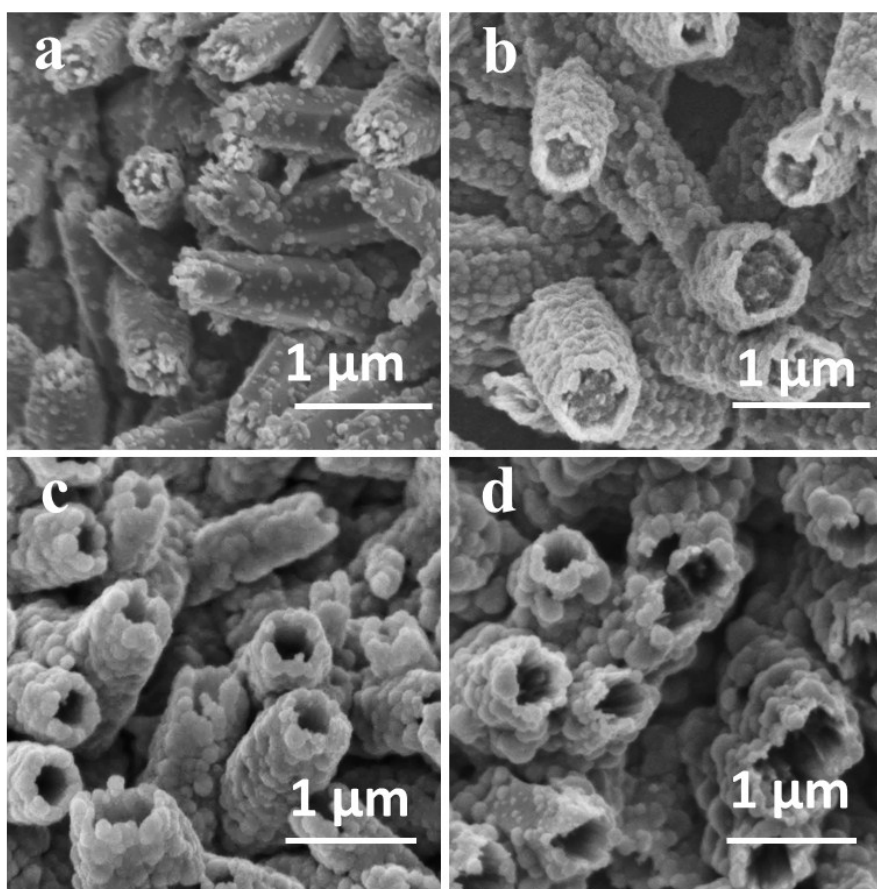

**Fig. S3** SEM images of ZnO@ZnMnO<sub>3</sub>-precursors with different electro-position times of (a) 5 min, (b) 10 min, (c) 20 min and (d) 25 min.

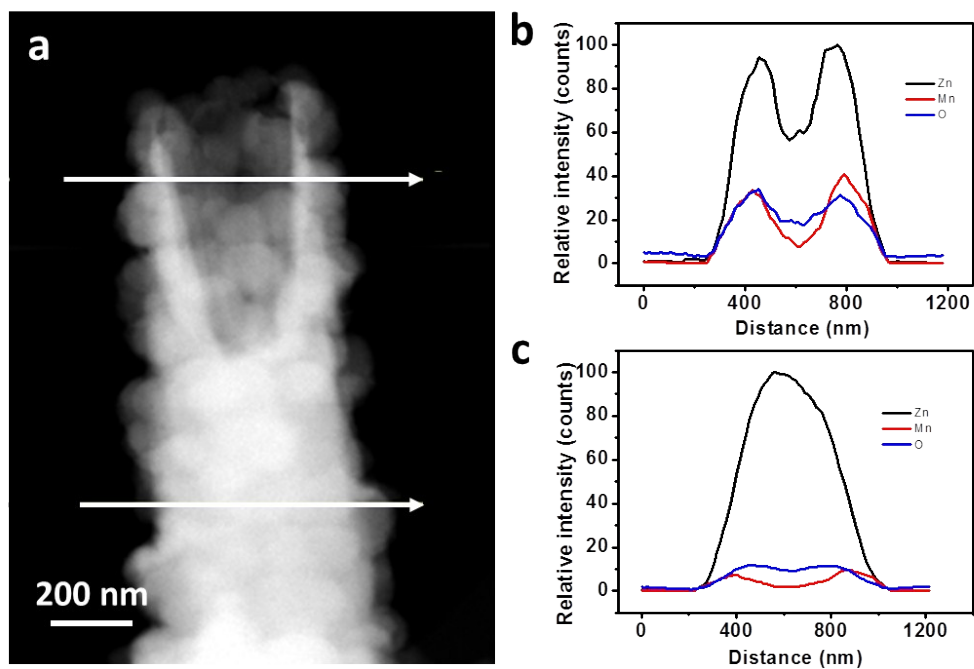

**Fig. S4** (a) STEM of ZnO@ZnMnO<sub>3</sub>-precursors core-shell nanorod with electro-deposition time of 20 min before dissolution of ZnO; (b,c) EDX line scans of different position of ZnO@ZnMnO<sub>3</sub>-precursors.

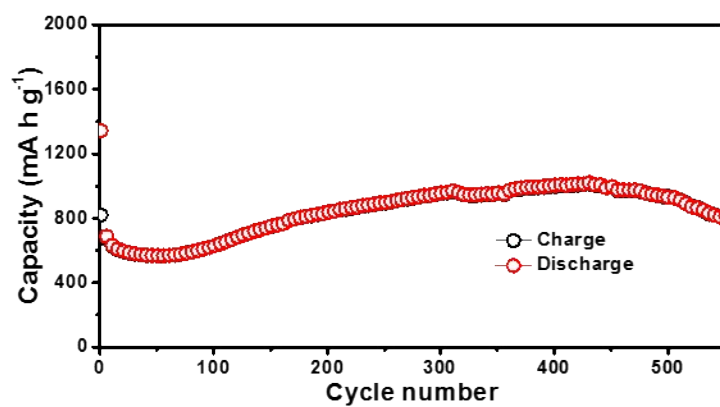

**Fig. S5.** Long cycling performance of ZnMnO<sub>3</sub> at a current density of 500 mA g<sup>-1</sup>.

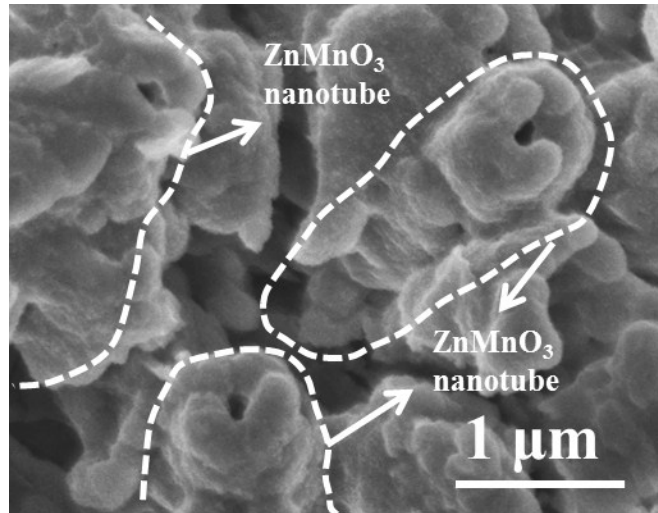

Fig. S6 SEM image of the ZnMnO<sub>3</sub> NTAs after 200 cycles.

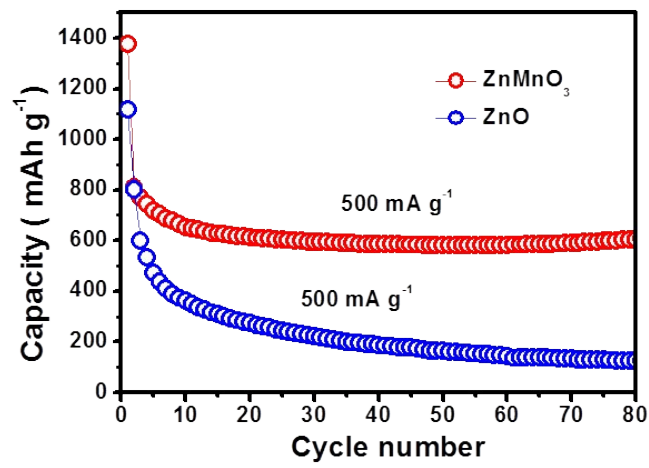

Fig. S7 Cycling performance of the ZnMnO<sub>3</sub> NTAs and the ZnO NRAs.

**Table S1** Comparison of ZnMnO<sub>3</sub> NTAs versus several kinds of MOMTs for LIBs.

| Materials                                               | Cycling performance                                                                                                             | Rate performance                                                                                                                                                                                                                                           | Reference |
|---------------------------------------------------------|---------------------------------------------------------------------------------------------------------------------------------|------------------------------------------------------------------------------------------------------------------------------------------------------------------------------------------------------------------------------------------------------------|-----------|
| ZnMnO <sub>3</sub> NTAs                                 | 858mAh g <sup>-1</sup> at 500 mA g <sup>-1</sup> after 200 cycles (capacity rising during the cycling). 99% capacity retention  | 827mA g <sup>-1</sup> at 100mA g <sup>-1</sup><br>701mA g <sup>-1</sup> at 200mA g <sup>-1</sup><br>466mA g <sup>-1</sup> at 1000mA g <sup>-1</sup><br>364mA g <sup>-1</sup> at 2000mA g <sup>-1</sup><br>208mA g <sup>-1</sup> at 5000mA g <sup>-1</sup>  | This work |
| ZnMn <sub>2</sub> O <sub>4</sub> ball-in-ball           | 750 mAh g <sup>-1</sup> at 400 mA g <sup>-1</sup> after 120 cycles (capacity rising during the cycling). 99% capacity retention | 683 mA g <sup>-1</sup> at 600 mA g <sup>-1</sup><br>618mA g <sup>-1</sup> at 800mA g <sup>-1</sup><br>480mA g <sup>-1</sup> at 1000mA g <sup>-1</sup><br>396mA g <sup>-1</sup> at 1200mA g <sup>-1</sup>                                                   | [1]       |
| Double-shelled CoMn <sub>2</sub> O <sub>4</sub>         | 624mAh g <sup>-1</sup> at 200 mA g <sup>-1</sup> after 50 cycles. 76% capacity retention                                        | 624mA g <sup>-1</sup> at 200 mA g <sup>-1</sup><br>515mA g <sup>-1</sup> at 515mA g <sup>-1</sup>                                                                                                                                                          | [2]       |
| NiCo <sub>2</sub> O <sub>4</sub> nanotubes              | 590mAh g <sup>-1</sup> at 100 mA g <sup>-1</sup> after 200 cycles. 59% capacity retention                                       | 590mA g <sup>-1</sup> at 100 mA g <sup>-1</sup><br>273mA g <sup>-1</sup> at 5000mA g <sup>-1</sup>                                                                                                                                                         | [3]       |
| Porous Ni <sub>x</sub> Co <sub>3-x</sub> O <sub>4</sub> | 844mAh g <sup>-1</sup> at 500 mA g <sup>-1</sup> after 200 cycles (capacity rising during the cycling). 99% capacity retention  | 1331mA g <sup>-1</sup> at 100 mA g <sup>-1</sup><br>736mA g <sup>-1</sup> at 200mA g <sup>-1</sup><br>589mA g <sup>-1</sup> at 400mA g <sup>-1</sup><br>545mA g <sup>-1</sup> at 800mA g <sup>-1</sup><br>293mA g <sup>-1</sup> at 1600 mA g <sup>-1</sup> | [4]       |
| CoV <sub>2</sub> O <sub>6</sub> nanosheets              | 702mAh g <sup>-1</sup> at 200 mA g <sup>-1</sup> after 200 cycles. 88% capacity retention                                       | 435mA g <sup>-1</sup> at 200mA g <sup>-1</sup><br>581mA g <sup>-1</sup> at 5000 mA g <sup>-1</sup>                                                                                                                                                         | [5]       |
| CoMo <sub>2</sub> O <sub>4</sub> nanosheets             | 894 mAh g <sup>-1</sup> at 100 mA g <sup>-1</sup> after 100 cycles. 88% capacity retention                                      | 1008mA g <sup>-1</sup> at 200mA g <sup>-1</sup><br>996mA g <sup>-1</sup> at 300mA g <sup>-1</sup><br>918mA g <sup>-1</sup> at 500mA g <sup>-1</sup><br>778mA g <sup>-1</sup> at 1000mA g <sup>-1</sup><br>611mA g <sup>-1</sup> at 1500mA g <sup>-1</sup>  | [6]       |
| NiCo <sub>2</sub> O <sub>4</sub> spheres                | 706 mAh g <sup>-1</sup> at 200 mA g <sup>-1</sup> after 100 cycles. 78% capacity retention                                      | 834mA g <sup>-1</sup> at 300mA g <sup>-1</sup><br>745mA g <sup>-1</sup> at 600mA g <sup>-1</sup><br>662mA g <sup>-1</sup> at 1000mA g <sup>-1</sup><br>533mA g <sup>-1</sup> at 2000mA g <sup>-1</sup>                                                     | [7]       |
| ZnFe <sub>2</sub> O <sub>4</sub> microrods              | 542mAh g <sup>-1</sup> at 1000 mA g <sup>-1</sup> at 488th cycles (capacity rising during the cycling). 100% capacity retention | 1141mA g <sup>-1</sup> at 100mA g <sup>-1</sup><br>781mA g <sup>-1</sup> at 250mA g <sup>-1</sup><br>481mA g <sup>-1</sup> at 500mA g <sup>-1</sup><br>416mA g <sup>-1</sup> at 1000mA g <sup>-1</sup><br>326mA g <sup>-1</sup> at 1500mA g <sup>-1</sup>  | [8]       |



## Reference

- [1] G. Zhang, L. Yu, H. B. Wu, H. E. Hoster, X. W. Lou, *Adv. Mater.*, 2012, **24**, 4609-4613.
- [2] L. Zhou, D. Zhao, X. W. Lou, *Adv. Mater.*, 2012, **24**, 745-748.
- [3] J. Zhu, Z. Xu, B. Lu, *Nano Energy*, 2014, **7**, 114-123.
- [4] F. Zheng, D. Zhu, Q. Chen, *ACS Appl. Mater. Interfaces*, 2014, **6**, 9256-9264.
- [5] L. Zhang, K. Zhao, Y. Lou, Y. Dong, M. Yan, W. Ren, L. Zhou, L. Qu, L. Mai, *ACS Appl. Mater. Interfaces*, 2016, **8**, 7139-7146.
- [6] H. Yu, C. Guan, X. Rui, B. Ouyang, B. Yadian, Y. Huang, H. Zhang, H.-E. Hoster, H.-J. Fan, Q. Yan, *Nanoscale*, 2014, **6**, 10556-10561.
- [7] L. Shen, L. Yu, X. -Y. Yu, X. Zhang, X. W. Lou, *Angew. Chem. Int. Ed.*, 2015, **54**, 1868-1872.
- [8] L. Hou, H. Hua, L. Lian, H. Cao, S. Zhu, C. Yuan, *Chem. Eur. J.*, 2015, **21**, 13012-13019.
